# Supplementary material
Source: publisher figshare collection journal article supplement (https://sage.figshare.com/ndownloader/files/14812958)
Supplement: Supplementary file 1 [file 14812958]

**Supplementary Table 1** Delayed anti-emetic efficacy: logistic regression analysis adjusting for control of acute CINV (intention-to-treat population, n= 81)

|  | **Ola vs. Dex** | | |  | **Ola + Dex vs. Dex** | | |  |
| --- | --- | --- | --- | --- | --- | --- | --- | --- |
| **Time period** | **End point** | **OR (95% CI)*** | ***P* value** |  | **End point** | **OR (95% CI)*** | ***P* value** |  |
| Delayed (days 2-5) | TC | 0.59 (0.17, 2.07) | 0.416 |  | TC | 0.51 (0.15, 1.71) | 0.279 |  |
|  |  |  |  |  |  |  |  |  |
| Delayed (days 2-5) | CP | 1.13 (0.32, 4.04) | 0.850 |  | CP | 1.60 (0.37, 6.82) | 0.527 |  |
|  |  |  |  |  |  |  |  |  |
| Delayed (days 2-5) | CR | 0.92 (0.25, 3.42) | 0.903 |  | CR | 2.63 (0.43, 15.9) | 0.292 |  |
|  |  |  |  |  |  |  |  |  |
| Delayed (days 2-5) | NSN | 1.25 (0.28, 5.68) | 0.768 |  | NSN | 1.87 (0.28, 12.3) | 0.513 |  |
|  |  |  |  |  |  |  |  |  |
| Delayed (days 2-5) | No Nausea | 0.44 (0.11, 1.75) | 0.246 |  | No Nausea | 0.36 (0.09, 1.35) | 0.130 |  |

CINV, chemotherapy-induced nausea and vomiting; Ola, olanzapine; Dex, dexamethasone; OR, odds ratio; CI, confidence interval; TC, total control (no vomiting, no rescue medication, and no nausea); CP, complete protection (no vomiting, no rescue medication, and no more than mild nausea); CR, complete response (no vomiting and no rescue medication); NSN, no clinically significant nausea (none or only mild nausea)

*calculated by logistic regression models adjusting for control of acute CINV
